# Supplementary material for: Mixed-dimensional InAs nanowire on layered molybdenum disulfide heterostructures via selective-area van der Waals epitaxy
Source: Royal Society of Chemistry journal article supplement (doi:10.1039/d0na00768d), 2021-01-01
Supplement: d0na00768d1.pdf [file d0na00768d1.pdf]

– Supporting Information –

# **Mixed-dimensional InAs Nanowire on Layered Molybdenum Disulfide Heterostructures via Selective-Area van der Waals Epitaxy**

Mohadeseh A. Baboli<sup>1,2</sup>, Alireza Abrand<sup>1,2</sup>, Robert A. Burke<sup>3,4</sup>, Anastasiia Fedorenko<sup>1,2</sup>, Thomas S. Wilhelm<sup>1,2</sup>, Stephen J. Polly<sup>2</sup>, Madan Dubey<sup>3</sup>, Seth M. Hubbard<sup>1,2</sup>, and Parsian K. Mohseni<sup>1,2,\*</sup>

<sup>1</sup>*Microsystems Engineering, Rochester Institute of Technology, Rochester, NY 14623, USA*

<sup>2</sup>*NanoPower Research Laboratories, Rochester Institute of Technology, Rochester, NY 14623, USA*

<sup>3</sup>*Sensors and Electron Devices Directorate, U.S. Army Research Laboratory, Adelphi, MD 20783, USA*

<sup>4</sup>*General Technical Services, LLC, Wall, NJ 07727, USA*

\*Author to whom correspondences should be addressed. E-mail: [pkmohseni@rit.edu](mailto:pkmohseni@rit.edu)

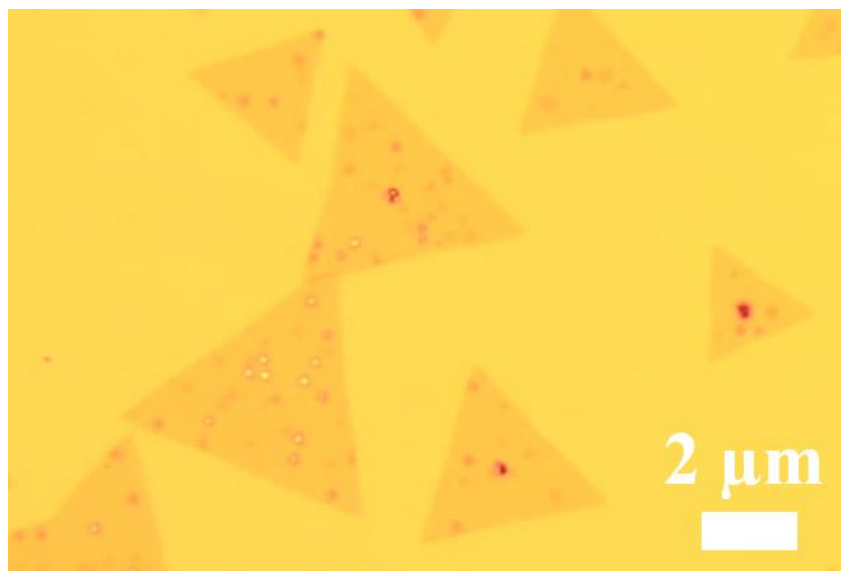

**Figure S1.** Optical image of MoS<sub>2</sub> micro-plates.

Figure S1 shows top-view optical image of isolated MoS<sub>2</sub> micro-plates. The particles on the surface of these MoS<sub>2</sub> domains are likely to be MoO<sub>3</sub> residues and multilayered MoS<sub>2</sub> sub-domains.

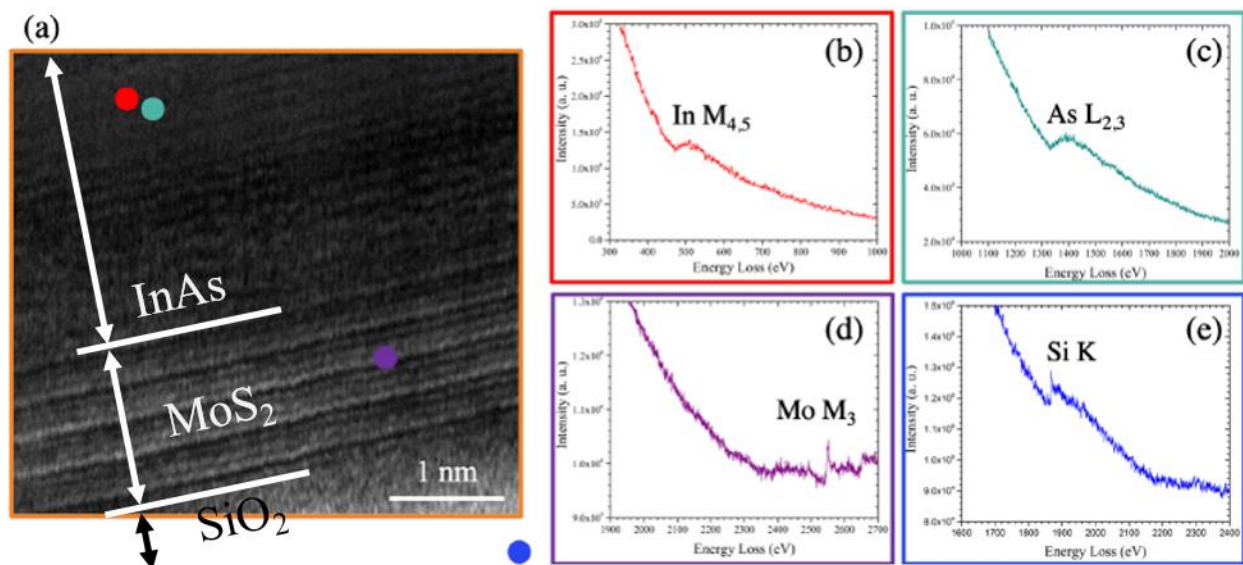

**Figure S2.** (a) HR-TEM image obtained from the InAs/MoS<sub>2</sub> interface. Electron energy-loss spectra (EELS) showing ionization edges corresponding to (b) In, (c) As, (d) Mo, and (e) Si elements. The color coded borders correspond to the matching markers in the HR-TEM image in (a). The Si EELS data is collected from the underlying Si substrate, which resides outside the viewing field of (a).

Compositional analysis of the InAs/MoS<sub>2</sub> interface was carried out using electron energy-loss spectroscopy (EELS) in a NION ultra-STEM 100 instrument. Figure S2(a) shows the HR-TEM image of multilayer MoS<sub>2</sub> and the base of an InAs NW. The EELS spectra with corresponding peaks marked for In M<sub>4,5</sub>, As L<sub>2,3</sub>, Mo M<sub>3</sub>, and Si K ionization edges are shown in Figure S2(b), (c), (d), and (e), respectively. The locations where the EELS data was collected are shown on Figure S2(a) with red, green, violet, and blue dots representing elemental In, As, Mo, and Si, respectively. Here, five layers of MoS<sub>2</sub> can be counted. During CVD synthesis of MoS<sub>2</sub> domains on SiO<sub>2</sub>/Si, high concentrations of MoO<sub>3</sub> and S vapor precursors initiates a self-seeding nucleation mechanism, resulting in the formation of a central particle-type feature with a multilayer structure. In contrast, by lowering the concentration of reactants in the CVD chamber, the 2-D planar nucleation mechanism leads to production of monolayer or bilayer MoS<sub>2</sub><sup>1</sup>.

## Reference

- [1] D. Zhou, H. Shu, C. Hu, L. Jiang, P. Liang, and X. Chen, *Cryst. Growth Des.*, 2018,**18**, 1012–1019.
